# Supplementary material
Source: PubMed Central journal article supplement (PMC4821168)
Supplement: NIHMS765845-supplement-supplement_1.pdf [file NIHMS765845-supplement-supplement_1.pdf]

Supplementary Table 1

| Table 1: Parameters for NMR Experiments <sup>1</sup> |                       |                              |                         |      |          |
|------------------------------------------------------|-----------------------|------------------------------|-------------------------|------|----------|
|                                                      |                       |                              | Parameters <sup>2</sup> |      |          |
|                                                      |                       |                              | time                    | freq | Acq time |
| experiment                                           | Dim                   | Nuc                          | pts                     | pts  | (ms)     |
| 2D <sup>1</sup> H, <sup>15</sup> N                   | <i>t</i> <sub>1</sub> | <sup>15</sup> N              | 256                     | 512  | 25.6     |
| HSQC                                                 | <i>t</i> <sub>2</sub> | <sup>1</sup> H               | 1024                    | 2048 | 106.5    |
| 3D <sup>15</sup> Nedited                             | <i>t</i> <sub>1</sub> | <sup>15</sup> N              | 64                      | 128  | 27.4     |
| HNCA                                                 | <i>t</i> <sub>2</sub> | <sup>13</sup> C              | 100                     | 256  | 16.6     |
|                                                      | <i>t</i> <sub>3</sub> | <sup>1</sup> H               | 1024                    | 2048 | 122.1    |
| 3D <sup>15</sup> Nedited                             | <i>t</i> <sub>1</sub> | <sup>1</sup> H               | 256                     | 512  | 5.2      |
| NOESY <sup>3</sup>                                   | <i>t</i> <sub>2</sub> | <sup>15</sup> N              | 84                      | 256  | 5.7      |
|                                                      | <i>t</i> <sub>3</sub> | <sup>1</sup> H               | 1024                    | 2048 | 53.2     |
| 3D HNHA                                              | <i>t</i> <sub>1</sub> | <sup>1</sup> H               | 128                     | 256  | 10.0     |
|                                                      | <i>t</i> <sub>2</sub> | <sup>15</sup> N              | 40                      | 128  | 11.4     |
|                                                      | <i>t</i> <sub>3</sub> | <sup>1</sup> H               | 1024                    | 2048 | 122.1    |
| 3D                                                   | <i>t</i> <sub>1</sub> | <sup>13</sup> C <sup>4</sup> | 100                     | 256  | 4.4      |
| CBCA(CO)NH                                           | <i>t</i> <sub>2</sub> | <sup>15</sup> N              | 40                      | 128  | 13.7     |
|                                                      | <i>t</i> <sub>3</sub> | <sup>1</sup> H               | 1024                    | 2048 | 106.5    |
| 3D                                                   | <i>t</i> <sub>1</sub> | <sup>13</sup> C              | 112                     | 256  | 5.5      |
| HNCACB                                               | <i>t</i> <sub>2</sub> | <sup>15</sup> N              | 58                      | 128  | 27.4     |
|                                                      | <i>t</i> <sub>3</sub> | <sup>1</sup> H               | 1024                    | 2048 | 61.0     |
| 3D HNCO                                              | <i>t</i> <sub>1</sub> | <sup>13</sup> C <sup>5</sup> | 100                     | 256  | 16.5     |
|                                                      | <i>t</i> <sub>2</sub> | <sup>15</sup> N              | 64                      | 128  | 25.7     |
|                                                      | <i>t</i> <sub>3</sub> | <sup>1</sup> H               | 1024                    | 2048 | 122.1    |
| 3D                                                   | <i>t</i> <sub>1</sub> | <sup>1</sup> H               | 128                     | 512  | 5.2      |
| HC(CO)NH                                             | <i>t</i> <sub>2</sub> | <sup>15</sup> N              | 44                      | 128  | 25.7     |
|                                                      | <i>t</i> <sub>3</sub> | <sup>1</sup> H               | 1024                    | 2048 | 106.5    |
| 3D                                                   | <i>t</i> <sub>1</sub> | <sup>13</sup> C <sup>4</sup> | 110                     | 512  | 5.5      |
| C(CO)NH                                              | <i>t</i> <sub>2</sub> | <sup>15</sup> N              | 64                      | 128  | 25.7     |
|                                                      | <i>t</i> <sub>3</sub> | <sup>1</sup> H               | 1024                    | 2048 | 61.1     |
| 4D <sup>13</sup> C, <sup>15</sup> N-                 | <i>t</i> <sub>1</sub> | <sup>13</sup> C <sup>6</sup> | 36                      | 128  | 13.8     |
| edited <sup>7</sup>                                  | <i>t</i> <sub>2</sub> | <sup>1</sup> H               | 128                     | 256  | 8.3      |
| NOESY                                                | <i>t</i> <sub>3</sub> | <sup>15</sup> N              | 36                      | 64   | 5.7      |
|                                                      | <i>t</i> <sub>4</sub> | <sup>1</sup> H               | 512                     | 1024 | 61.1     |
| 4D <sup>13</sup> C, <sup>13</sup> C-                 | <i>t</i> <sub>1</sub> | <sup>13</sup> C <sup>6</sup> | 36                      | 64   | 13.8     |
| edited <sup>7</sup>                                  | <i>t</i> <sub>2</sub> | <sup>13</sup> C <sup>6</sup> | 36                      | 64   | 13.8     |
| NOESY                                                | <i>t</i> <sub>3</sub> | <sup>1</sup> H               | 128                     | 256  | 7.3      |
|                                                      | <i>t</i> <sub>4</sub> | <sup>1</sup> H               | 1024                    | 2048 | 71.3     |

<sup>1</sup> Data were collected in H<sub>2</sub>O at 37 °C at 600.13 MHz for <sup>1</sup>H.<sup>2</sup> The number of points in the time domain is complex. The number of points in the frequency domain is real. The carrier frequency is 4.658 and 118.0 ppm for <sup>1</sup>H and <sup>15</sup>N, respectively, unless otherwise stated.<sup>3</sup> The NOE mixing time was 150 ms.<sup>4</sup> The <sup>13</sup>C carrier position was set at 43.78 ppm.<sup>5</sup> The <sup>13</sup>C carrier position was set at 173.78 ppm.<sup>6</sup> The <sup>13</sup>C carrier position was set at 40.78 ppm.<sup>7</sup> The NOE mixing time was 130 ms.

Supplementary Figure 1

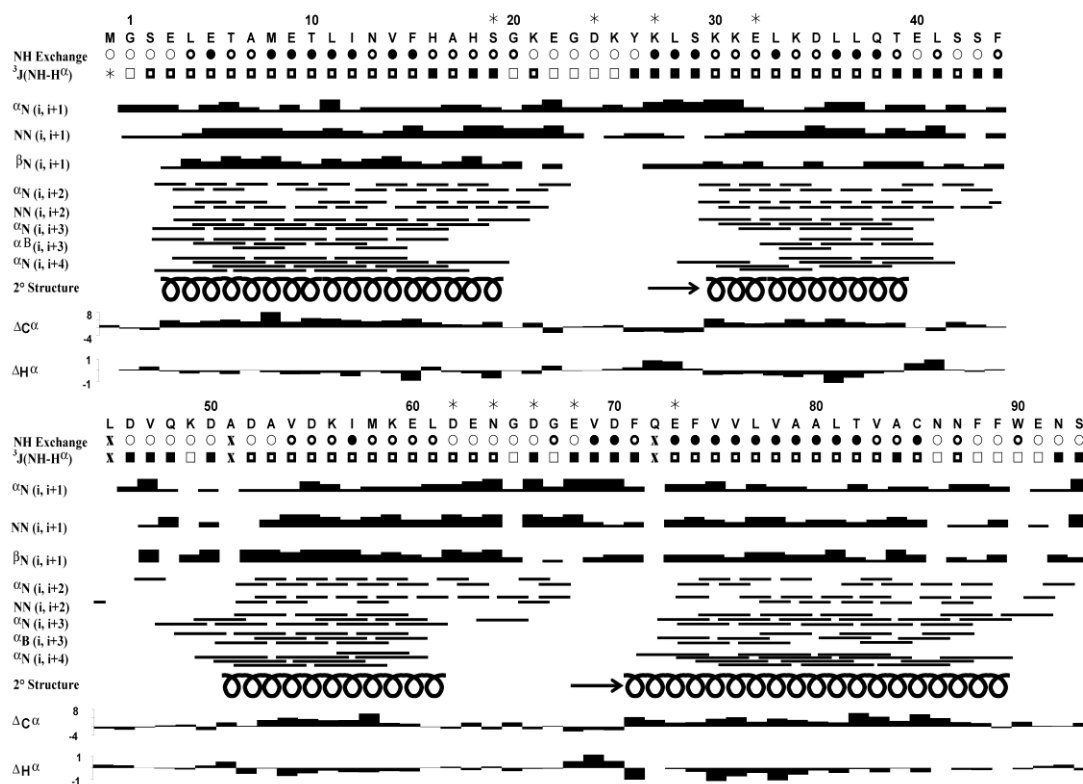

**Supplementary Fig. 1.** Secondary structure of S100A1 in the  $\text{Ca}^{2+}$ -S100A1-RyRP12 complex. Diagram of amide exchange, HNHA  $J$ -couplings, sequential connectivities, NOE connectivities, and the secondary structure for reduced,  $\text{Ca}^{2+}$ -loaded, RyRP12 bound S100A1. Stars above the sequence represent  $\text{Ca}^{2+}$ -binding residues. Circles indicate relative amide hydrogen exchange rates at  $37^\circ\text{C}$  as determined using 2D  $^1\text{H}$   $^{15}\text{N}$  HSQC spectra. Open circles ( $T < 10$  min.) are arbitrarily referred to as fast exchanging amide protons. Residues with partially filled circles are arbitrarily referred to as medium exchanging amide protons ( $T < 16$  h). Residues with solid circles are referred to as slowly exchanging protons ( $T > 16$  h). Squares refer to  $^3J(\text{HN-H}^\alpha)$  coupling from a 3D HNHA experiment, where open squares represent data not obtained, partially filled squares refer to  $^3J$ -coupling  $< 6$  Hz, and closed squares represent  $^3J$  coupling  $> 6$  Hz. The NOE correlations were determined from 3D  $^{15}\text{N}$ -edited NOESY-HSQC, 4D  $^{13}\text{C}$ ,  $^{15}\text{N}$ -edited NOESY, and 4D  $^{13}\text{C}$ ,  $^{13}\text{C}$ -edited NOESY experiments. The height of the bars indicates the strength of the NOE (strong, medium, medium-weak, weak, and very weak). NOE correlations from non-neighboring residues are indicated by lines connecting the residues. Deviations in the  $^{13}\text{C}^\alpha$  and  $^1\text{H}^\alpha$  chemical shift from those of a random coil are illustrated such that regions of contiguous upfield-shifted  $^{13}\text{C}^\alpha$  chemical shifts (positive values) and downfield  $^1\text{H}^\alpha$  chemical shifts (negative values) are indicative of helical regions. Likewise, regions of contiguous downfield-shifted  $^{13}\text{C}^\alpha$  chemical shifts (negative values) and upfield-shifted  $^1\text{H}^\alpha$  chemical shifts (positive values) are indicative of  $\beta$ -sheet. The secondary structure, as derived from all of the data presented here, is represented by  $\alpha$ -helices (spirals)  $\beta$ -sheets (arrows) and loops (no symbol), as indicated under the appropriate residues in the sequence of S100A1.

**S100A1 Binds to the Calmodulin-binding Site of Ryanodine Receptor and Modulates Skeletal Muscle Excitation-Contraction Coupling**  
Benjamin L. Prosser, Nathan T. Wright, Erick O. Hernández-Ochoa, Kristen M. Varney, Yewei Liu, Rotimi O. Olojo, Danna B. Zimmer, David J. Weber and Martin F. Schneider

*J. Biol. Chem.* 2008, 283:5046-5057.

doi: 10.1074/jbc.M709231200 originally published online December 17, 2007

---

Access the most updated version of this article at doi: [10.1074/jbc.M709231200](https://doi.org/10.1074/jbc.M709231200)

Alerts:

- [When this article is cited](#)
- [When a correction for this article is posted](#)

[Click here](#) to choose from all of JBC's e-mail alerts

Supplemental material:

<http://www.jbc.org/content/suppl/2007/12/18/M709231200.DC1.html>

This article cites 62 references, 20 of which can be accessed free at <http://www.jbc.org/content/283/8/5046.full.html#ref-list-1>
